# Supplementary material
Source: PubMed Central journal article supplement (PMC3557398)

## Supplementary information

### Figure 1:

*Anti-ICAM-1 reduces the binding and motility of T-cells on LN slices.  $Ctla4^{+/+}$  CD4 positive T-cells were cultured and layered on LN slices in the presence or absence of anti-ICAM-1.*

### Figure 2:

*Comparable expression of FoxP3 in DO11.10x $Ctla4^{+/+}$  and  $Ctla4^{-/-}$  CD4<sup>+</sup>CD25<sup>+</sup> and CD4<sup>+</sup>CD25<sup>-</sup> T-cells. Pre-activated DO11.10x $Ctla4^{+/+}$  CD4<sup>+</sup>T-cells were stained with FoxP3-Fitc and CD25-APC (upper panel) and DO11.10x $Ctla4^{-/-}$  CD4<sup>+</sup>T-cells with Foxp3-APC and CD25-PE (lower panel).*

### Movies:

**Movie 1:** *Movies of the movement of  $Ctla4^{-/-}$  and  $Ctla4^{+/+}$  DO11.10 T-cells and their interaction with DCs in the absence and presence of OVA peptide on lymph node slices. Green: T-cells; red: DCs. Upper left: CD4<sup>+</sup>  $Ctla4^{-/-}$  DO11.10 T-cells with DCs; lower left: CD4<sup>+</sup>  $Ctla4^{-/-}$  DO11.10 T-cells with DC-OVA. Upper middle: CD4<sup>+</sup>  $Ctla4^{+/+}$  DO11.10 T-cells with DCs; lower middle: CD4<sup>+</sup>  $Ctla4^{+/+}$  DO11.10 T-cells with DC-OVA. Upper right: CD4<sup>+</sup>  $Ctla4^{-/-}$  DO11.10 T-cells transfected with CTLA-4 with DCs; lower right: CD4<sup>+</sup>  $Ctla4^{-/-}$  DO11.10 T-cells transfected with CTLA-4 with DC-OVA.*

**Movie 2:** *Movies of the movement of  $Ctla4^{+/+}$  CD4<sup>+</sup> CD25<sup>-</sup> and CD4<sup>+</sup> CD25<sup>+</sup> DO11.10 T-cells and their interaction with DCs in the absence and presence of OVA peptide on lymph node slices. Green: T-cells; red: DCs. Upper left: CD4<sup>+</sup>CD25<sup>-</sup> with DCs; upper right: CD4<sup>+</sup>CD25<sup>-</sup> with DC-OVA. Lower left: CD4<sup>+</sup>CD25<sup>+</sup> with DCs; lower right: CD4<sup>+</sup>CD25<sup>+</sup> with DC-OVA.*

**Movie 3:** *Movies of the movement of  $Ctla4^{-/-}$  CD4<sup>+</sup> CD25<sup>-</sup> and CD4<sup>+</sup> CD25<sup>+</sup> DO11.10 T-cells and their interaction with DCs in the absence and presence of OVA peptide on lymph node*

slices. Green: T-cells; red: DCs. Upper left: CD4<sup>+</sup>CD25<sup>-</sup> with DC; upper right: CD4<sup>+</sup>CD25<sup>-</sup> with DC-OVA. Lower left: CD4<sup>+</sup>CD25<sup>+</sup> with DC; lower right: CD4<sup>+</sup>CD25<sup>+</sup> with DC-OVA.

**Movie 4:** *Movies of the movement of Cd28<sup>+/+</sup> CD4<sup>+</sup> CD25<sup>-</sup> and CD4<sup>+</sup> CD25<sup>+</sup> DO11.10 T-cells and their interaction with DCs in the absence and presence of OVA peptide on lymph node slices. Green: T-cells; red: DCs. Upper left: CD4<sup>+</sup>CD25<sup>-</sup> with DCs; upper right: CD4<sup>+</sup>CD25<sup>-</sup> with DC-OVA. Lower left: CD4<sup>+</sup>CD25<sup>+</sup> with DCs; lower right: CD4<sup>+</sup>CD25<sup>+</sup> with DC-OVA.*

**Movie 5:** *Movies of the movement of Cd28<sup>-/-</sup> CD4<sup>+</sup> CD25<sup>-</sup> and CD4<sup>+</sup> CD25<sup>+</sup> DO11.10 T-cells and their interaction with DCs in the absence and presence of OVA peptide on lymph node slices. Green: T-cells; red: DCs. Upper left: CD4<sup>+</sup>CD25<sup>-</sup> with DCs; upper right: CD4<sup>+</sup>CD25<sup>-</sup> with DC-OVA. Lower left: CD4<sup>+</sup>CD25<sup>+</sup> with DCs; lower right: CD4<sup>+</sup>CD25<sup>+</sup> with DC-OVA.*

SFig.1

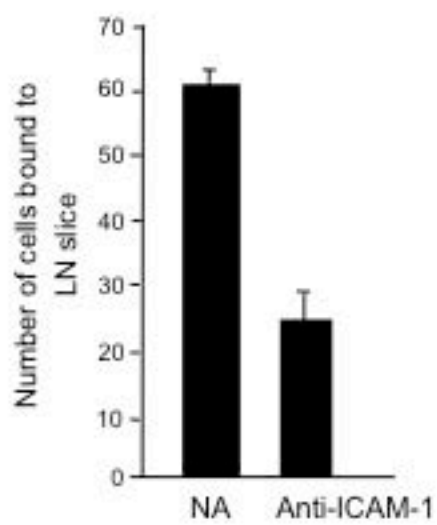

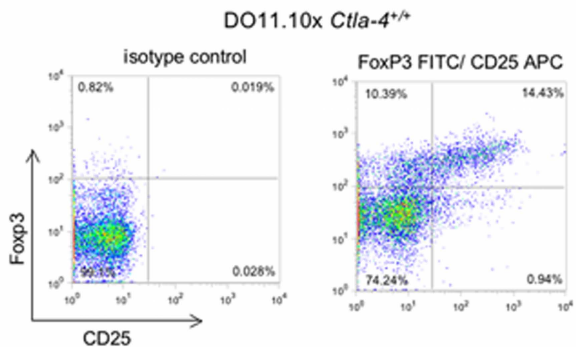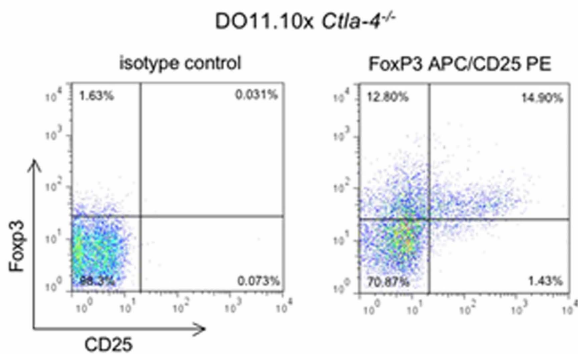

Supplement: supp_blood-2012-04-421420_Document1.pdf [file supp_blood-2012-04-421420_Document1.pdf]
